# Supplementary material for: In Vitro Mechanism of Action of Acanthospermum hispidum in Trypanosoma brucei
Source: Hindawi journal article supplement (doi:10.1155/2022/1645653), 2022-10-18
Supplement: f1 [file 1645653.f1.pdf]

**Figure S1:** Crude extraction and preparation of fractions

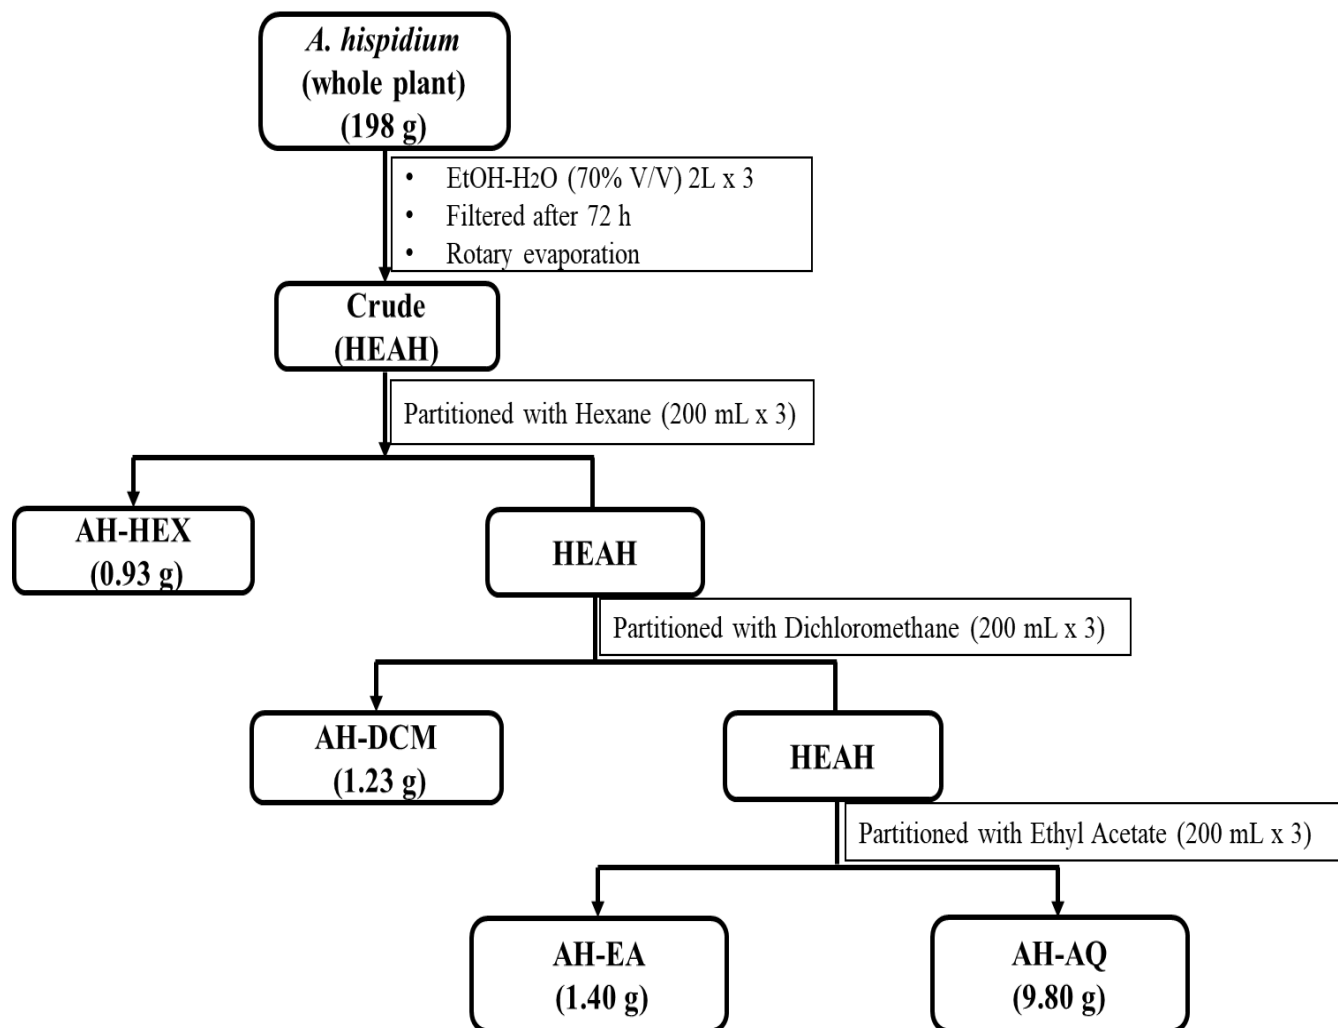

AH-HEX=hexane fraction, AH-DCM=dichloromethane fraction, AH-EA=ethyl acetate fraction, AH-AQ=aqueous fraction, HEAH=crude extract

**Figure S2:** Mass fragmentation for hexadecanoic acid, ethyl ester ( $m/z=284.4$ )

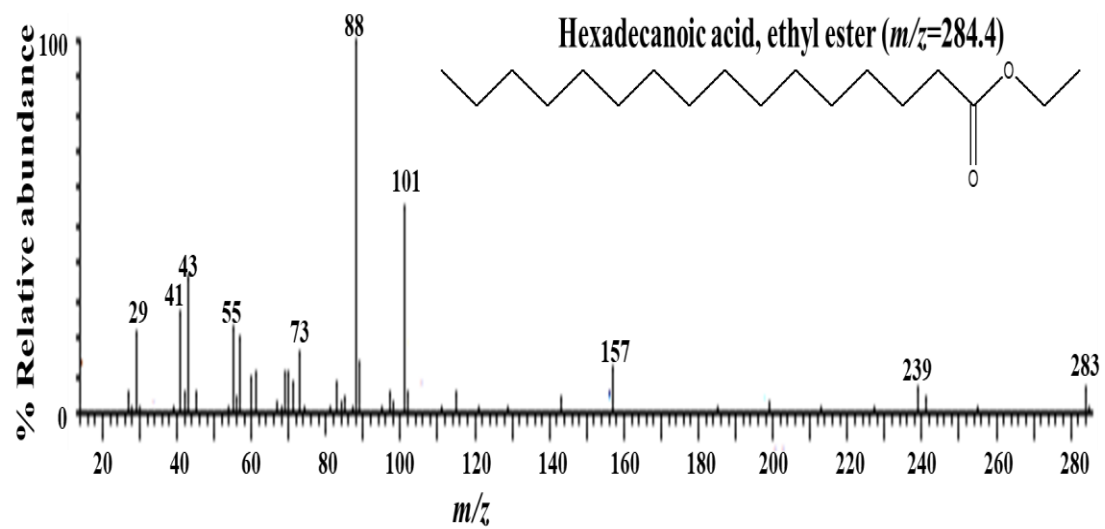

Ethyl hexadecanoate was identified through GC-MS analysis of hexane fraction of *A. hispidum*

**Figure S3:** Mass fragmentation for 9-octadecenamide, Z-( $m/z=281.4$ )

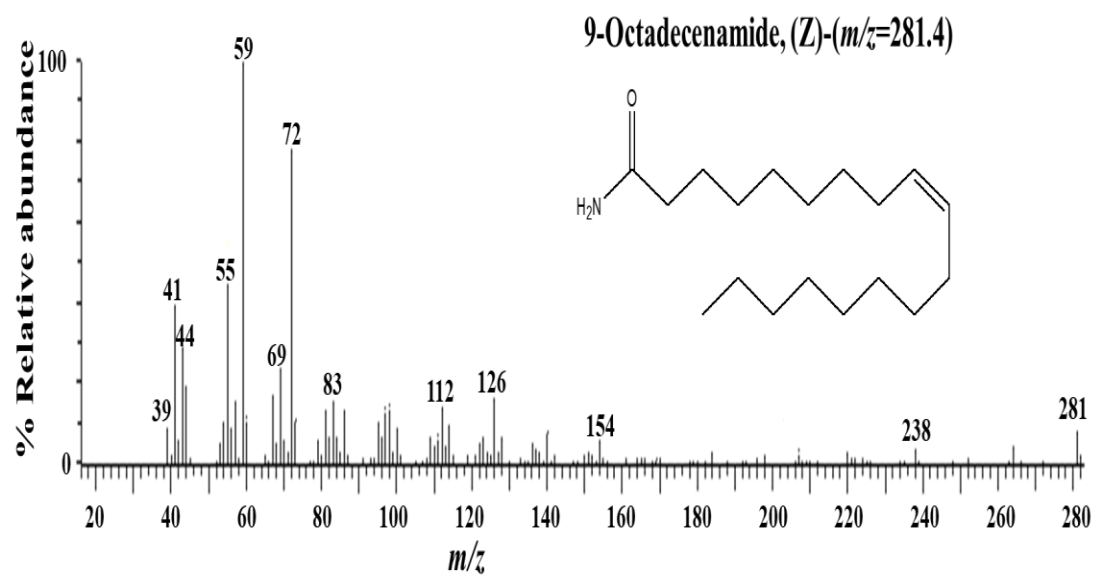

9(Z)-octadecenamide was identified through GC-MS analysis of dichloromethane fraction of *A. hispidum*

**Figure S4:** Mass fragmentation for 2,5,6,7-tetrahydro-3H-cyclopenta[c]pyridazin-3-one ( $m/z=136.1$ )

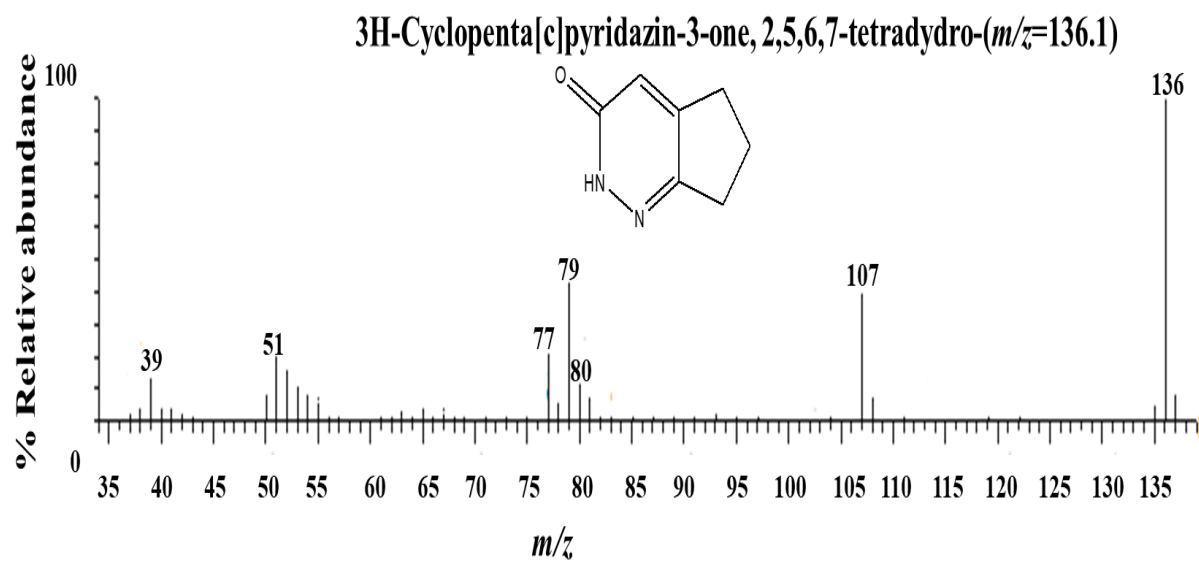

2,5,6,7-tetrahydro-3H-cyclopenta[c]pyridazin-3-one was identified through GC-MS analysis of ethylacetate and aqueous fractions of *A. hispidum*

**Table S1:** Percentage cell population in cell cycle phases

| <b>Percentage cell cycle population</b> |              |          |             |               |
|-----------------------------------------|--------------|----------|-------------|---------------|
| <b>Fractions</b>                        | <b>G0-G1</b> | <b>S</b> | <b>G2-M</b> | <b>&gt;2N</b> |
| NC                                      | 47.19        | 11.76    | 30.05       | 10.99         |
| DA                                      | 18.32        | 10.33    | 47.43       | 23.91         |
| AH-HEX                                  | 48.80        | 12.33    | 29.29       | 8.8           |
| AH-DCM                                  | 45.44        | 11.45    | 30.05       | 12.67         |
| AH-EA                                   | 49.75        | 11.85    | 29.47       | 8.93          |
| AH-AQ                                   | 48.53        | 12.77    | 29.49       | 9.2           |

AH-HEX=hexane fraction, AH-DCM=dichloromethane fraction, AH-EA=ethyl acetate fraction, AH-AQ=aqueous fraction, DA=diminazene aceturate, NC=negative control
